# Supplementary material for: Soft Wireless Headband Bioelectronics and Electrooculography for Persistent Human–Machine Interfaces
Source: PubMed Central journal article supplement (PMC9979786; doi:10.1021/acsaelm.2c01436), 2023-02-08

## Supporting Information

# Soft Wireless Headband Bioelectronics and Electrooculography for Persistent Human-Machine Interfaces

*Seunghyeob Ban<sup>1,2,10</sup>, Yoon Jae Lee<sup>2,3,10</sup>, Shinjae Kwon<sup>2,4</sup>, Yun Soung Kim<sup>5</sup>, Jae Won Chang<sup>6,\*</sup>, Jong-Hoon Kim<sup>1,7\*</sup>, Woon-Hong Yeo<sup>2,4,8,9\*</sup>*

<sup>1</sup>School of Engineering and Computer Science, Washington State University, Vancouver, WA, 98686, USA

<sup>2</sup>IEN Center for Human-Centric Interfaces and Engineering at the Institute for Electronics and Nanotechnology, Georgia Institute of Technology, Atlanta, GA 30332, USA

<sup>3</sup>School of Electrical and Computer Engineering, Georgia Institute of Technology, Atlanta, GA 30332, USA

<sup>4</sup>George W. Woodruff School of Mechanical Engineering, College of Engineering, Georgia Institute of Technology, Atlanta, GA 30332, USA

<sup>5</sup>BioMedical Engineering and Imaging Institute, Icahn School of Medicine at Mount Sinai, New York, NY 10029, USA

<sup>6</sup>Department of Otolaryngology Head and Neck Surgery, School of Medicine, Chungnam National University Hospital, Daejeon 35015, Republic of Korea

<sup>7</sup>Department of Mechanical Engineering, University of Washington, Seattle, WA, 98195, USA

<sup>8</sup>Wallace H. Coulter Department of Biomedical Engineering, Georgia Institute of Technology and Emory University School of Medicine, Atlanta, GA 30332, USA

<sup>9</sup>Parker H. Petit Institute for Bioengineering and Biosciences, Institute for Materials, Neural Engineering Center, Institute for Robotics and Intelligent Machines, Georgia Institute of Technology, Atlanta, GA 30332, USA

<sup>10</sup>These authors contributed equally to this work.

\*E-mail: Woon-Hong Yeo: whyeo@gatech.edu, Jong-Hoon Kim: jh.kim@wsu.edu or Jae Won Chang: strive1005@cnuh.co.kr

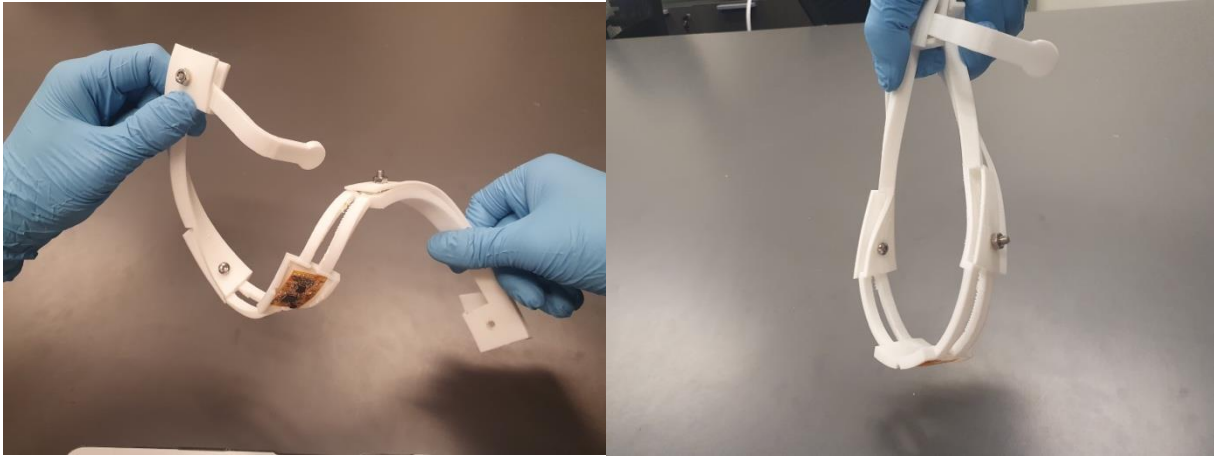

**Figure S1.** Photo (left) of twisted headband platform and photo (right) of banded headband platform.

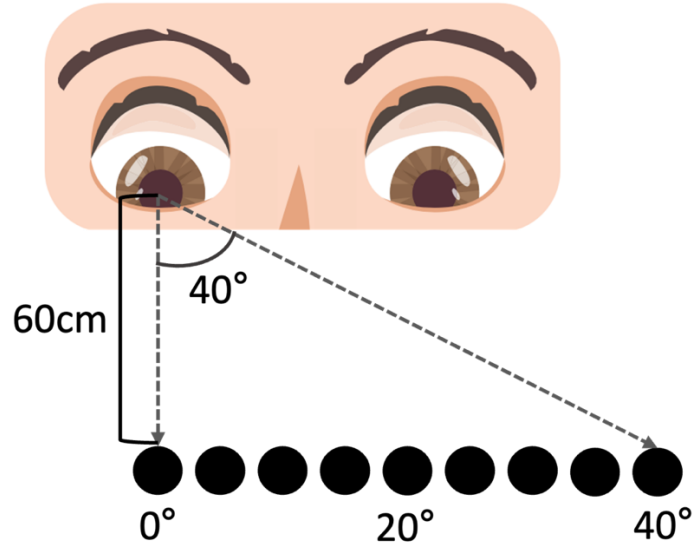

**Figure S2.** An experimental setup for EOG sensitivity by tracing a series of marked targets.

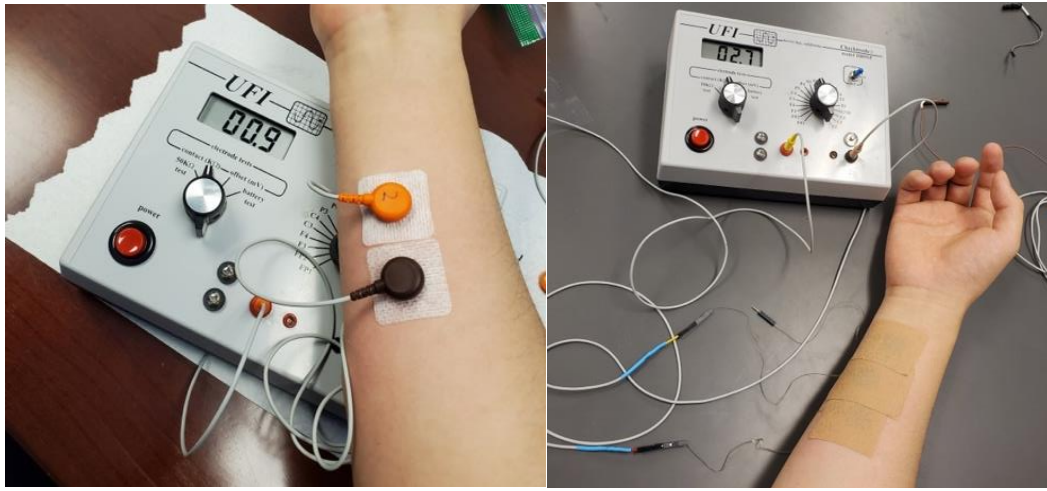

|                       | Impedance<br>( Ohm) | Unit area<br>( mm <sup>2</sup> ) | Impedance density<br>( Ohm / cm <sup>2</sup> ). |
|-----------------------|---------------------|----------------------------------|-------------------------------------------------|
| Gel<br>electrode      | 0.9                 | 113                              | 0.80                                            |
| Dry gold<br>electrode | 2.7                 | 35                               | 0.95                                            |

**Figure S3.** Photos of impedance measurement with conventional gel electrodes (left) and of dry gold electrodes (right).

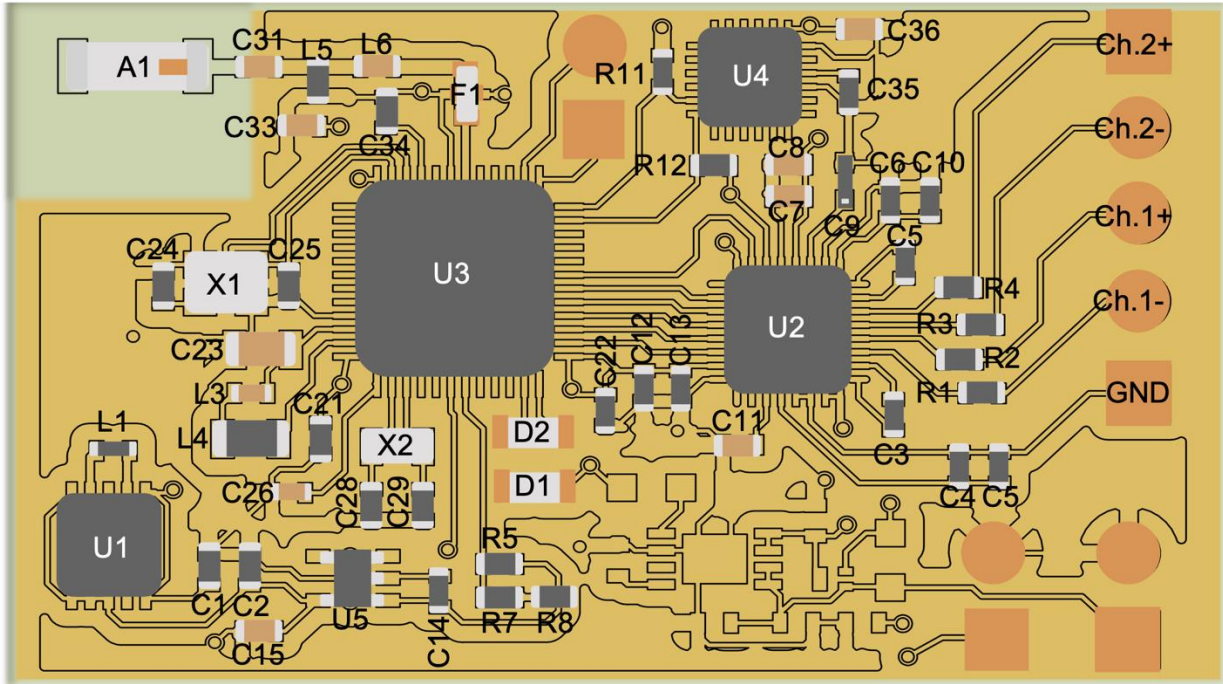

Figure S4. List of functional chips used in the flexible wireless circuit.

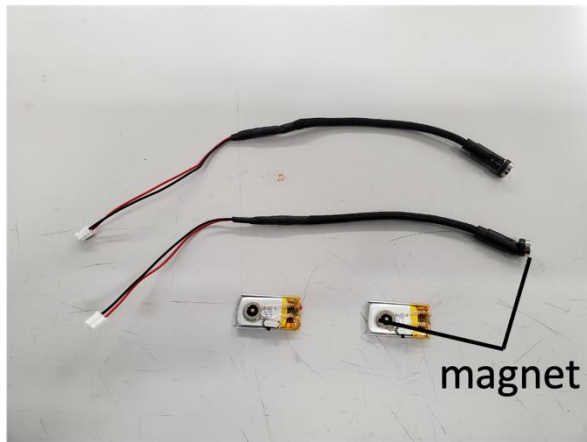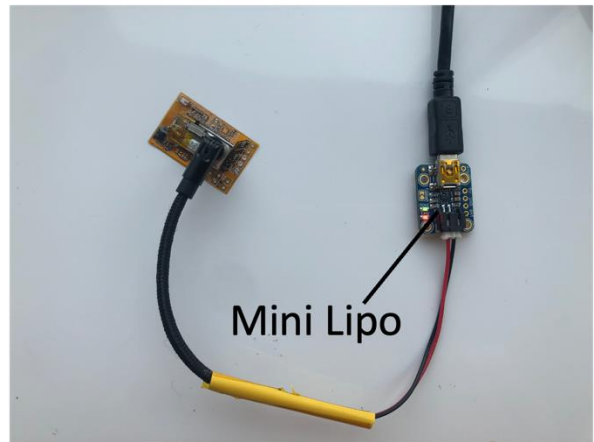

**Figure S5.** Photo of batteries and charger cables (left) and a charging circuit (right).

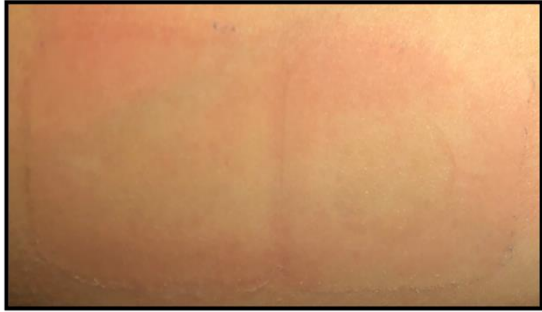

After removal gel electrodes

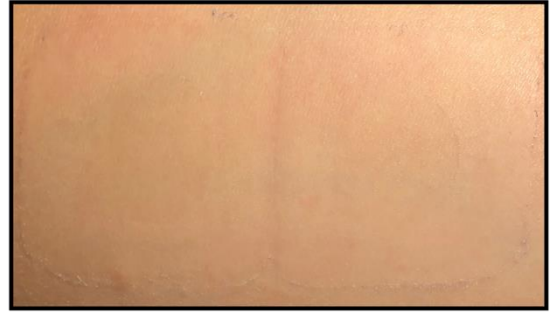

5 minutes later

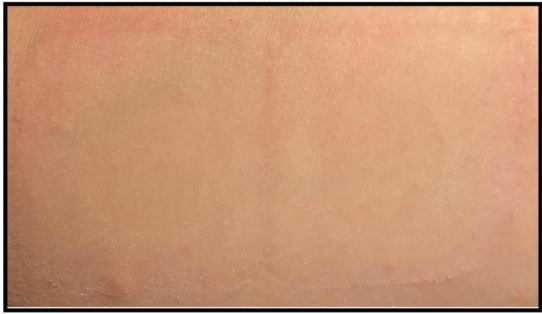

1 hour later

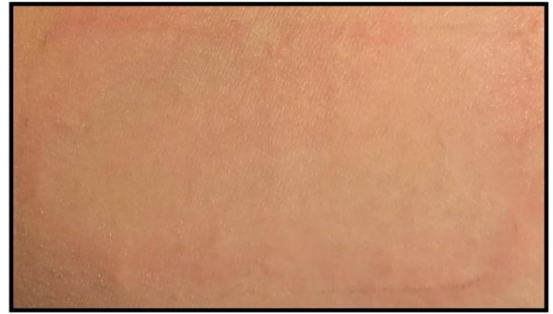

4 hours later

**Figure S6.** Photographs of skin rash to show How long a rash last.

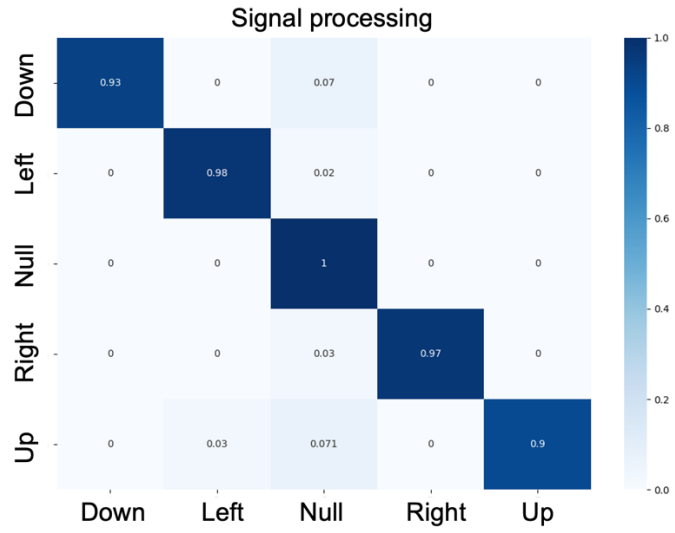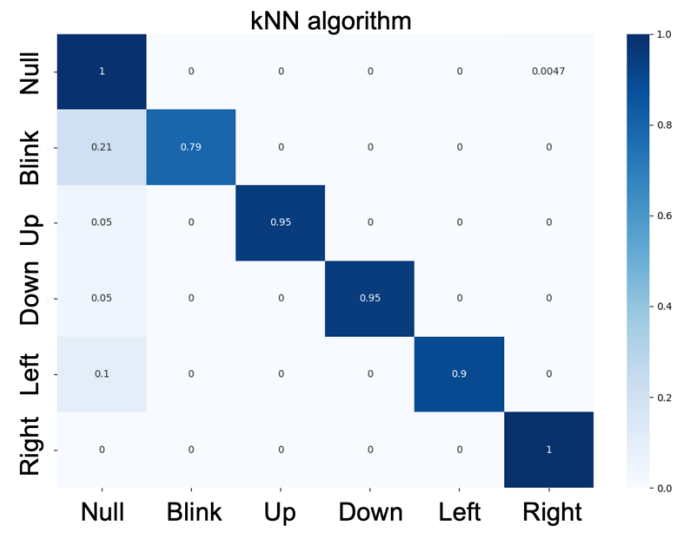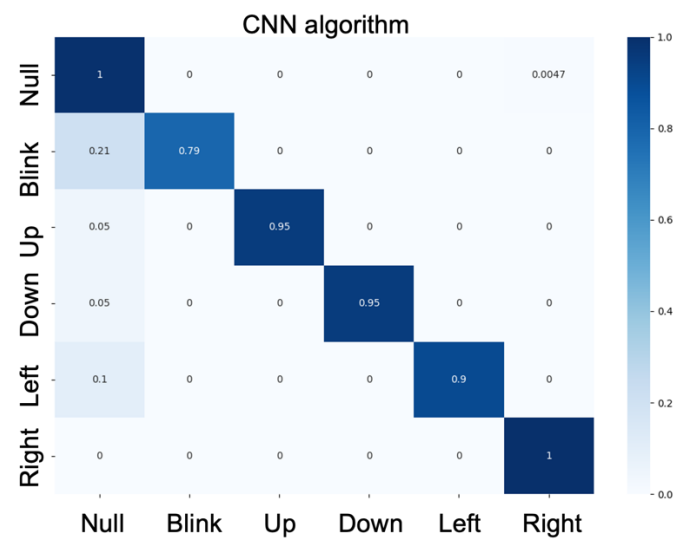

**Figure S7.** Comparison of detailed confusion matrix from signal processing, kNN, and CNN algorithms.



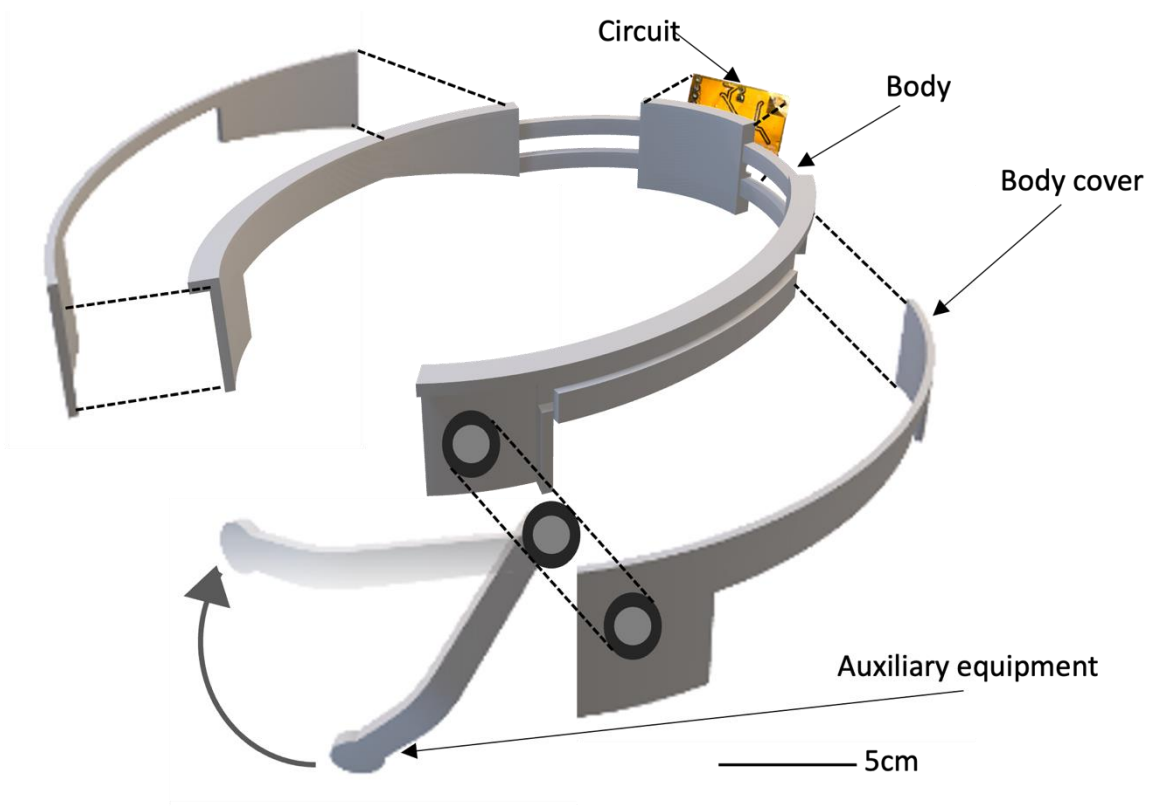

Figure S8. Exploded view of assembly drawing.

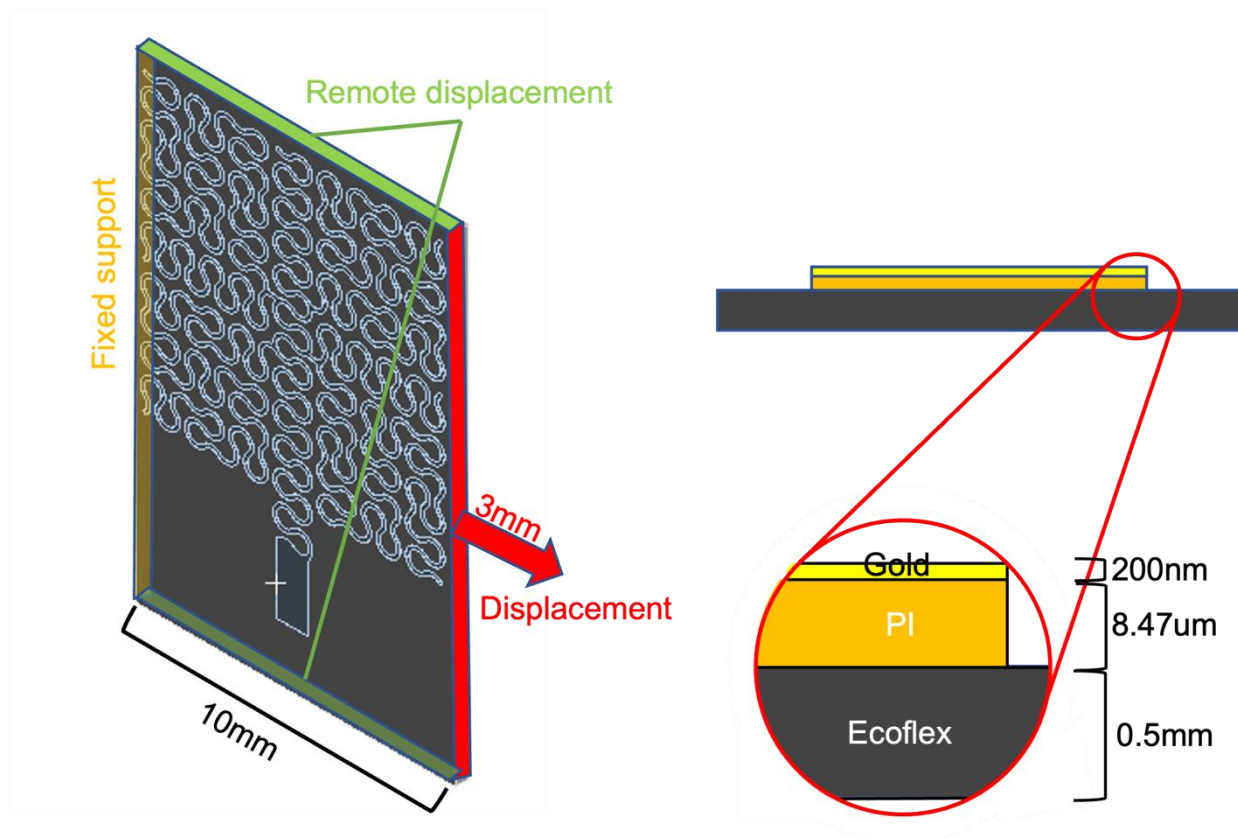

Figure S9. Setting FEA simulation value in ANSYS.

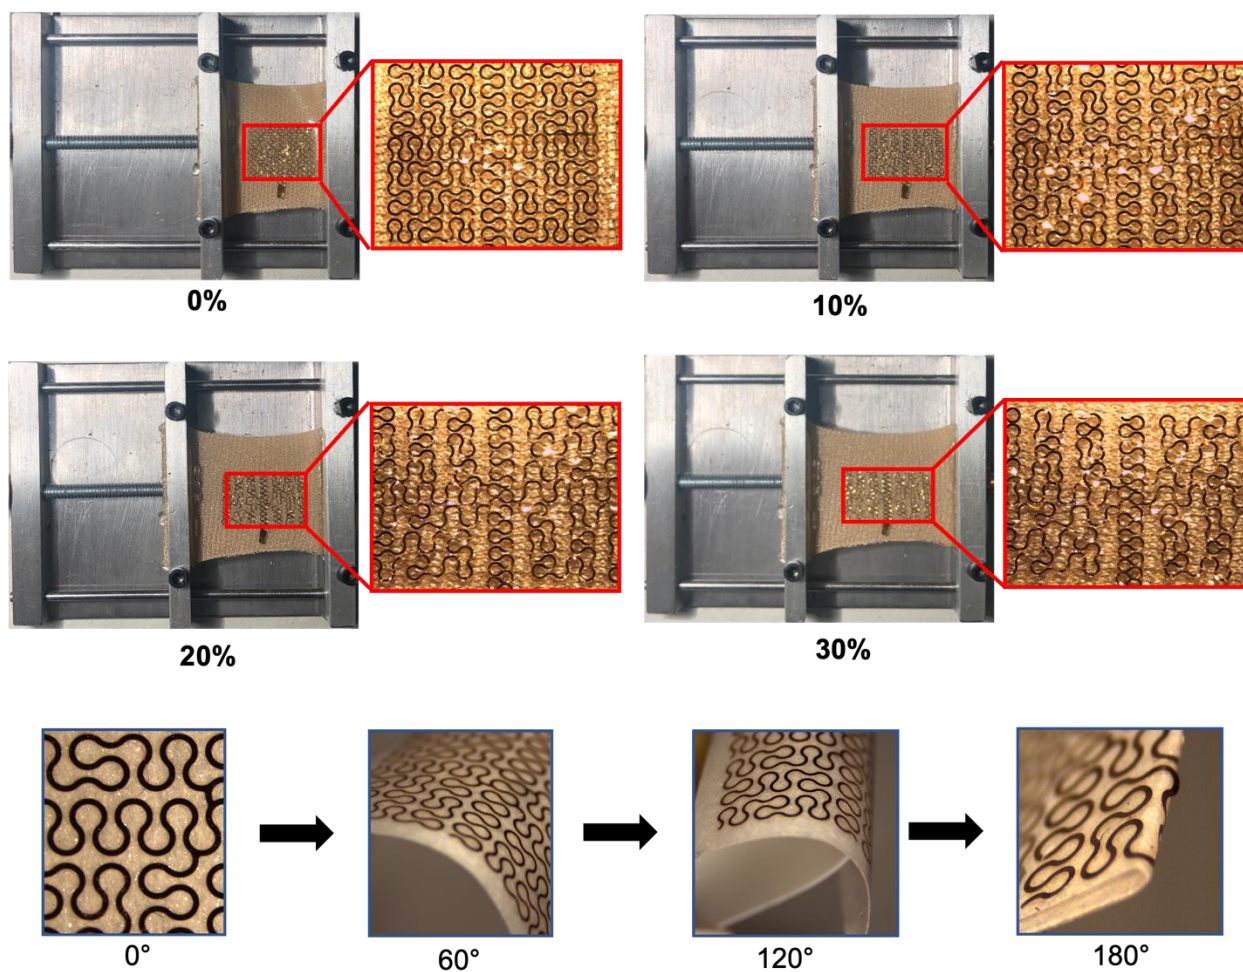

**Figure S10.** Photos (Up) of tensile testing of the exploded view of the gold fractal electrode. Photos (Down) of bending testing of the exploded view of the gold fractal electrode.

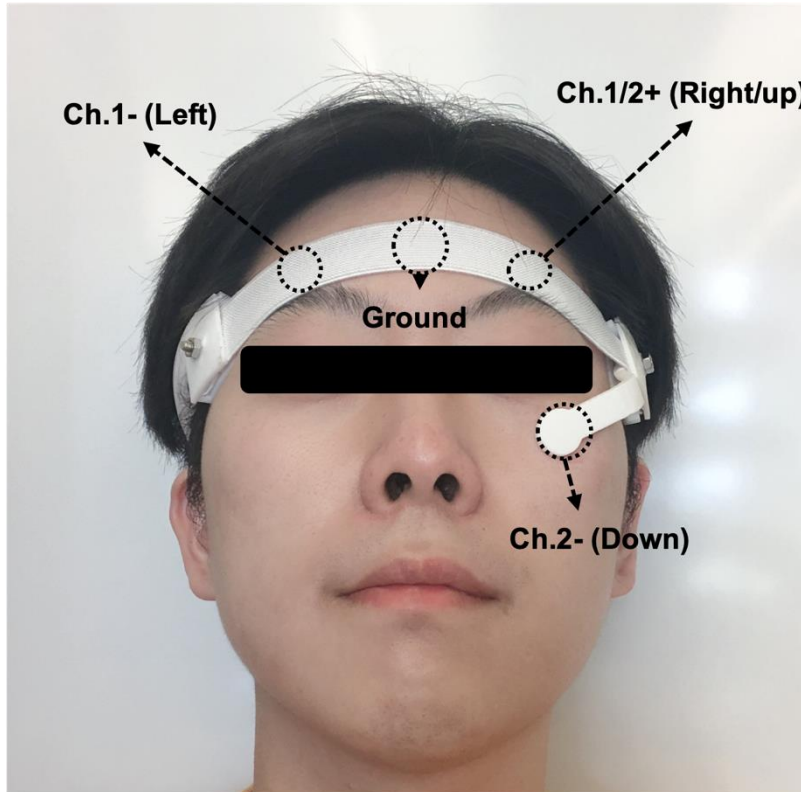

**Figure S11.** Photo of locations of the dry gold electrodes placed on a subject's facial.

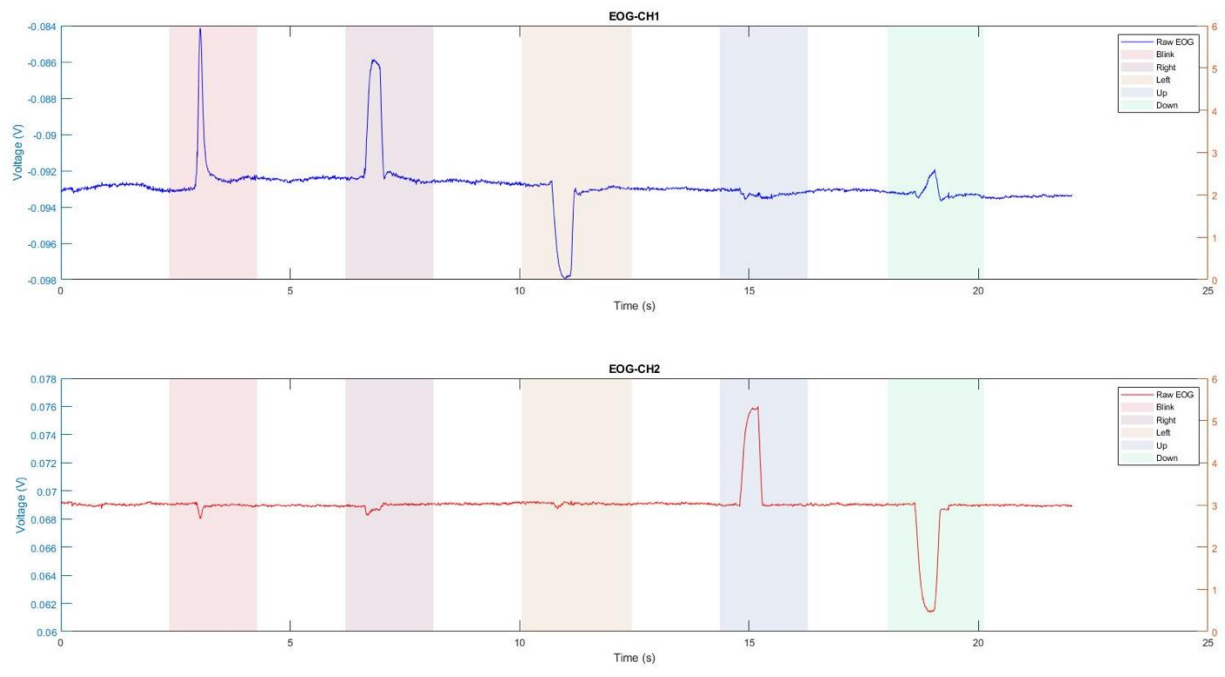

**Figure S12.** Raw EOG 2 channel data and classified result.

**Table S1.** The elastic moduli and Poisson's ratios of the studied materials

| <b>Material</b> | <b>Elastic modulus</b> | <b>Poisson's Ratio</b> |
|-----------------|------------------------|------------------------|
| Ecoflex         | 0.006 MPa              | 0.49                   |
| PI              | 2.5 GPa                | 0.49                   |
| Au              | 78 GPa                 | 0.44                   |

**Table S2.** List of functional chips used in the flexible wireless circuit.

| Component                            | Description                          | Value         | Part number      |
|--------------------------------------|--------------------------------------|---------------|------------------|
| U1                                   | 3.3 voltage regulator                | N/A           | TPS63001         |
| U2                                   | Analog front-end                     | N/A           | ADS1292          |
| U3                                   | Bluetooth PSoC                       | N/A           | NRF52832-QFAA-R  |
| U4                                   | Motion sensor                        | N/A           | MPU-9250         |
| U5                                   | Current limit active-low load switch | N/A           | TPS22941         |
| L1                                   | 0402 inductor                        | 2.2 $\mu$ H   | N/A              |
| L3                                   | 0402 inductor                        | 15 nH         | N/A              |
| L4                                   | 0603 inductor                        | 10 $\mu$ H    | N/A              |
| L5                                   | 0402 inductor                        | 10 nH         | N/A              |
| L6                                   | 0402 inductor                        | 2.7 nH        | N/A              |
| C1, C10, C14, C15                    | 0402 ceramic capacitor               | 10 $\mu$ F    | N/A              |
| C2                                   | 0402 ceramic capacitor               | 22 $\mu$ F    | N/A              |
| C3, C5                               | 0402 ceramic capacitor               | 4.7 nF        | N/A              |
| C4                                   | 0402 ceramic capacitor               | 1.0 nF        | N/A              |
| C6, C7, C12, C22, C26, C33, C35, C36 | 0402 ceramic capacitor               | 0.1 $\mu$ F   | N/A              |
| C8, C11, C13                         | 0402 ceramic capacitor               | 1.0 $\mu$ F   | N/A              |
| C9                                   | 0402 tantalum capacitor              | 1.0 $\mu$ F   | N/A              |
| C21                                  | 0402 ceramic capacitor               | 4.7 $\mu$ F   | N/A              |
| C23                                  | 0603 ceramic capacitor               | 10 $\mu$ F    | N/A              |
| C24, C25, C28, C29                   | 0402 ceramic capacitor               | 12 pF         | N/A              |
| C31                                  | 0402 capacitor                       | 0.4 pF        | N/A              |
| R1, R2, R3, R4                       | 0402 resistor                        | 30 k $\Omega$ | N/A              |
| R5, R6, R7, R8                       | 0402 resistor                        | 1 M $\Omega$  | N/A              |
| R11, R12                             | 0402 resistor                        | 10 k $\Omega$ | N/A              |
| A1                                   | 2.45 GHz RF chip antenna             | N/A           | 2450AT18A100     |
| F1                                   | 2.45 GHz low pass filter             | N/A           | 2450FM07A0029    |
| X1                                   | 32 MHz crystal                       | N/A           | ECS-320-8-37CKM  |
| X2                                   | 32.768 kHz crystal                   | N/A           | ECS-.327-9-12-TR |

**Video S1.** Real-time, continuous monitoring of EOG with a wearable device

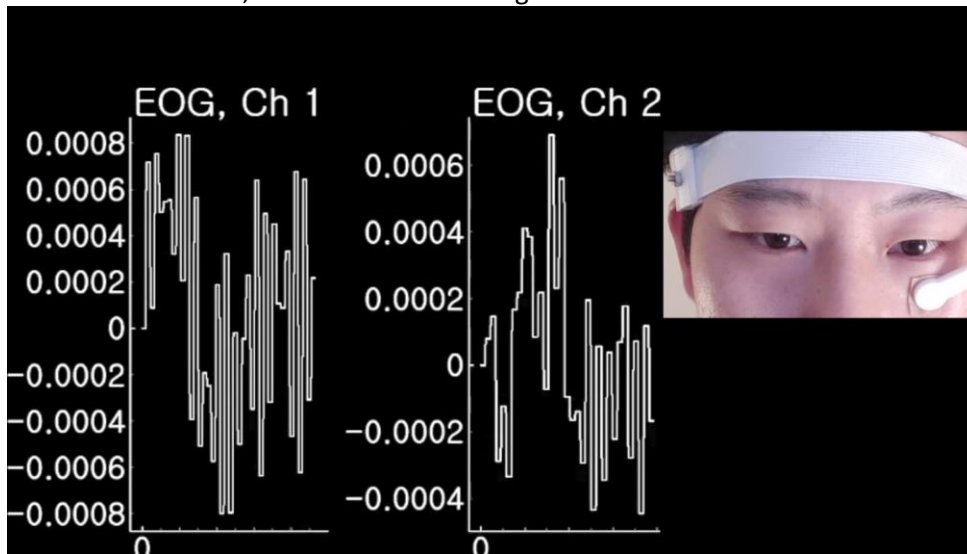

**Video S2.** Demonstration of wireless real-time control of a mini-drone car with the wearable device

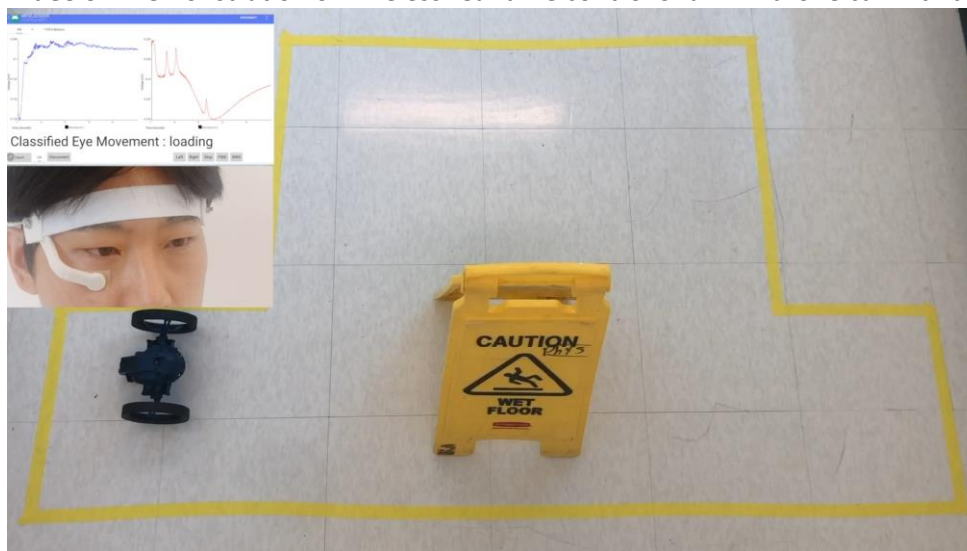

Supplement: el2c01436_si_001.pdf [file el2c01436_si_001.pdf]
